# Supplementary material
Source: PubMed Central journal article supplement (PMC2938148)
Supplement: pp.110.159459_1.pdf [file pp.110.159459_1.pdf]

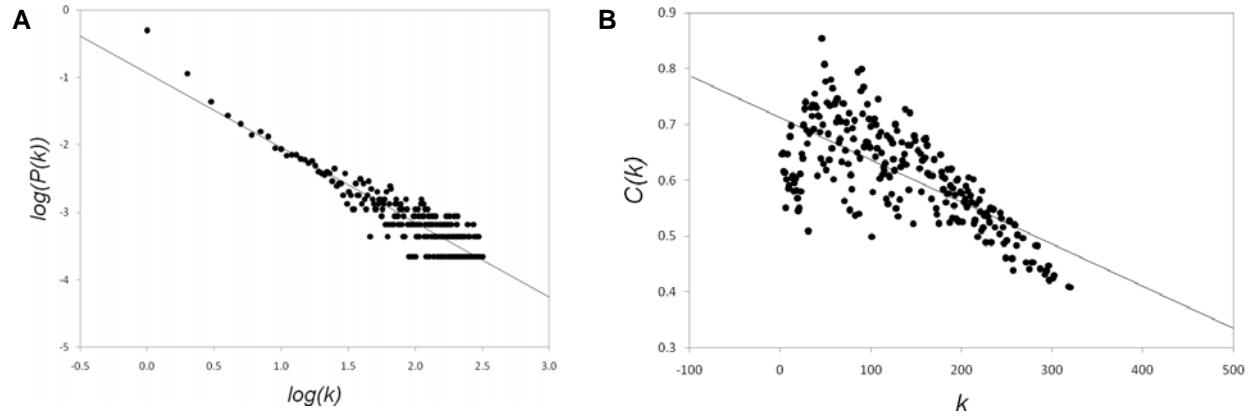

**Figure S1. Network characteristics.** A, The scatter plot of edges,  $\log(k)$ , versus the probability of a node having  $k$  edges,  $P(k)$ . Negative linear correlation indicates scale-free behavior. B, The scatter plot of  $k$  versus the average connectivity of any node having  $k$  edges,  $C(k)$ . Negative linear correlation indicates a hierarchical nature.

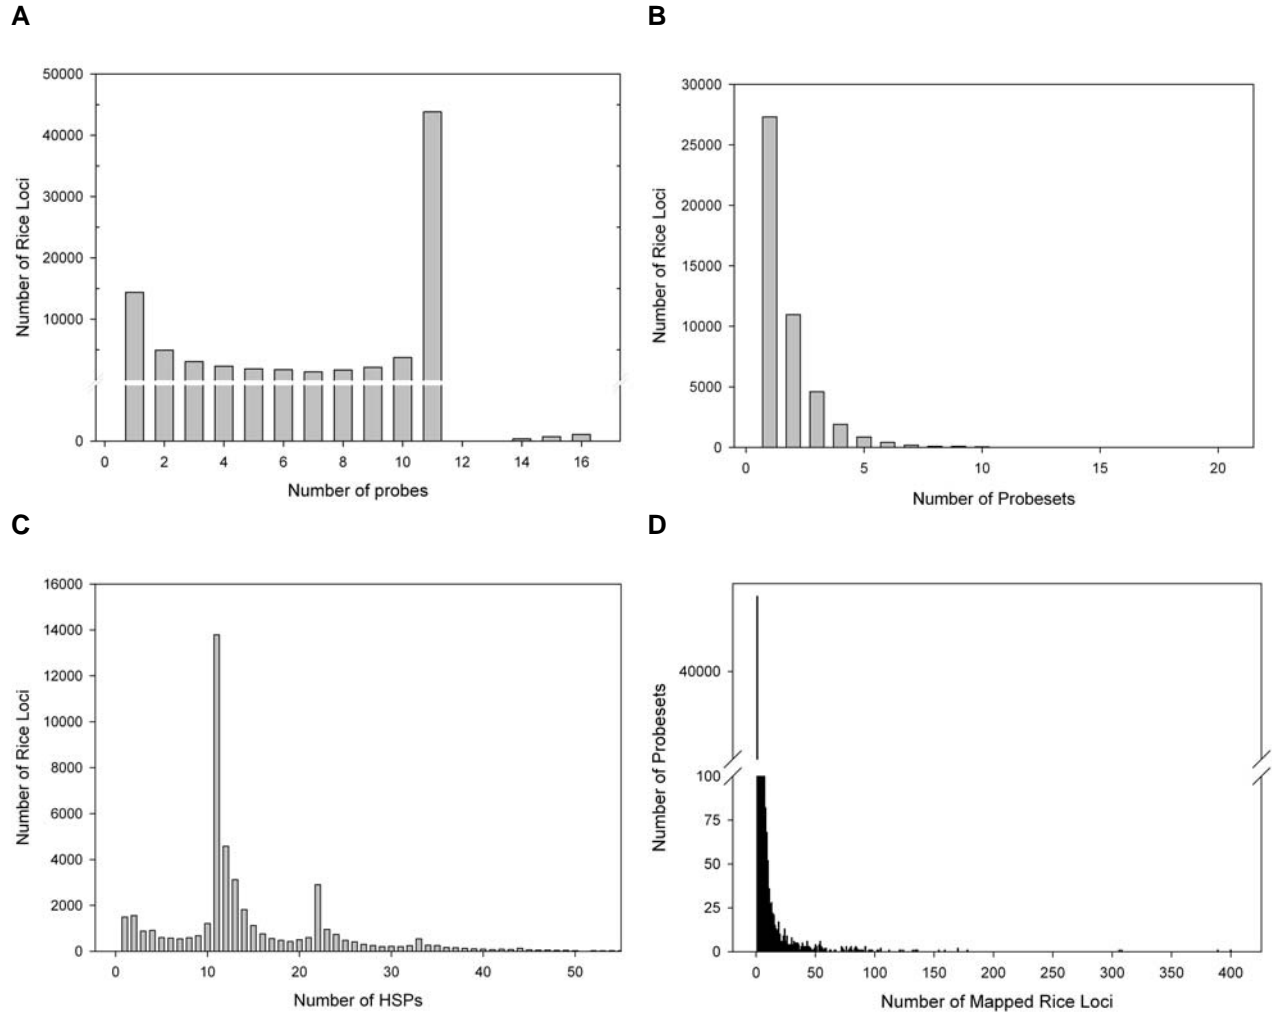

**Figure S2. Affymetrix rice probeset mapping to rice loci.** A, The distribution of the number of probes that map to a given number of rice loci. B, The number of rice loci that map to one or more probe sets. C, The distribution of high scoring segment pairs (HSPs) mapped to rice loci. D, The number of probe sets that map to individual rice loci.

**A****M2C1***Oryza sativa*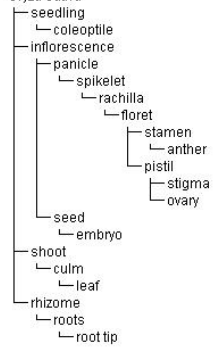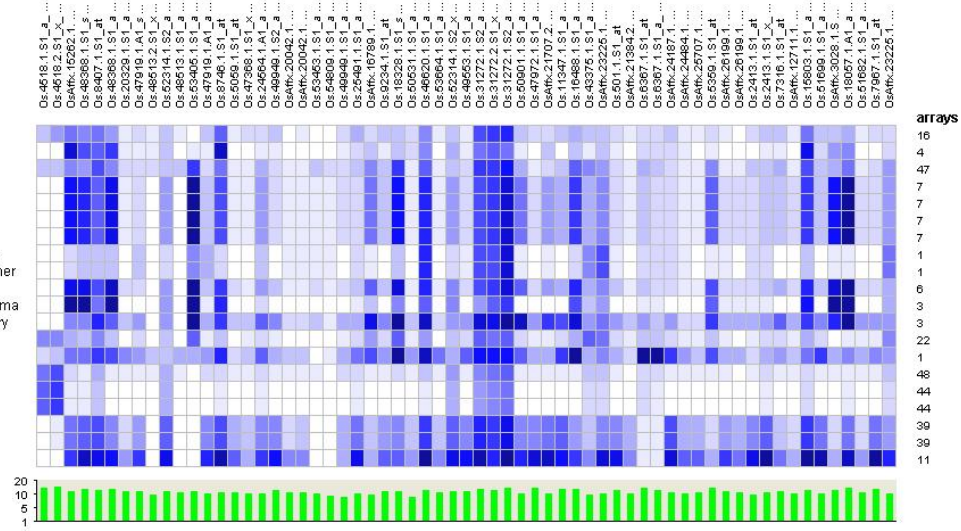**B****M2C1**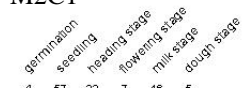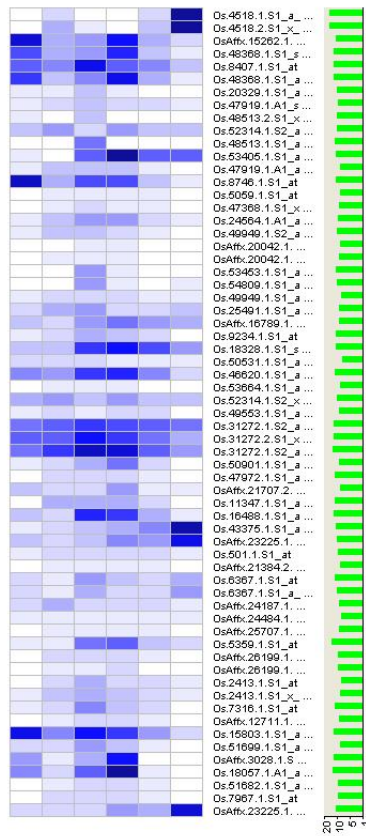

**C**

M2C2

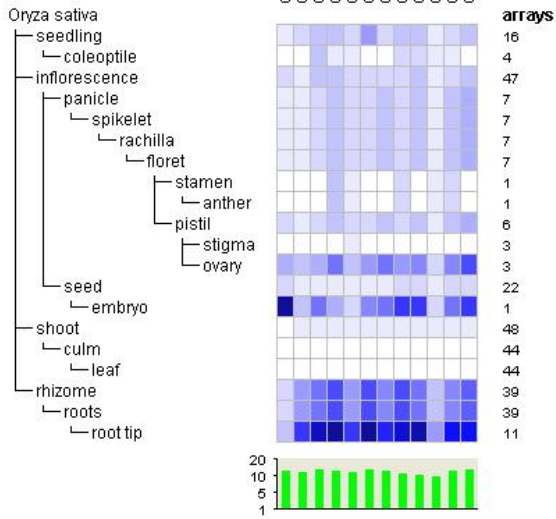

**D**

M2C2

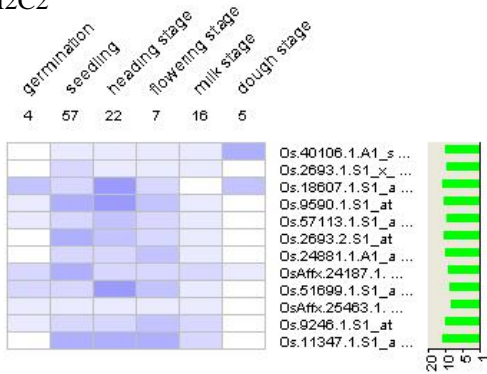

**E**

**M2C3**

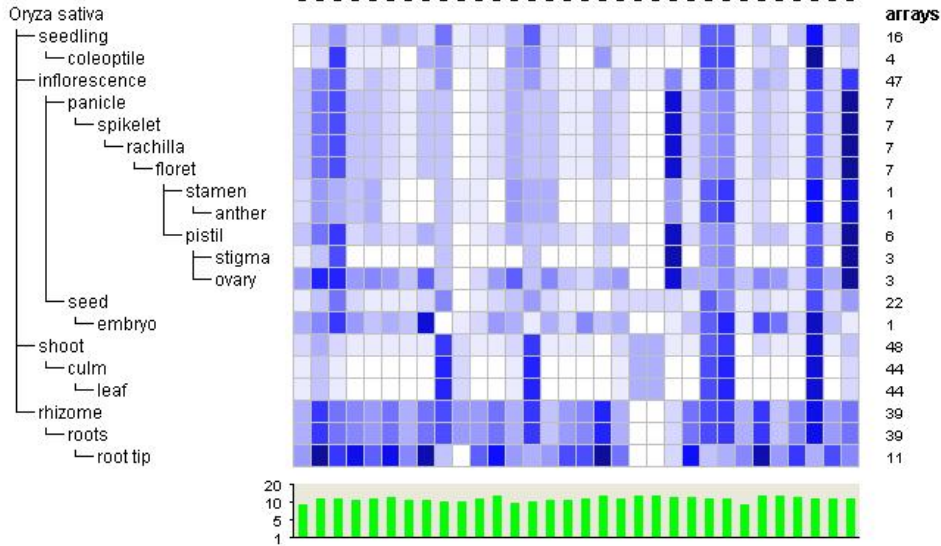

**F**

**M2C3**

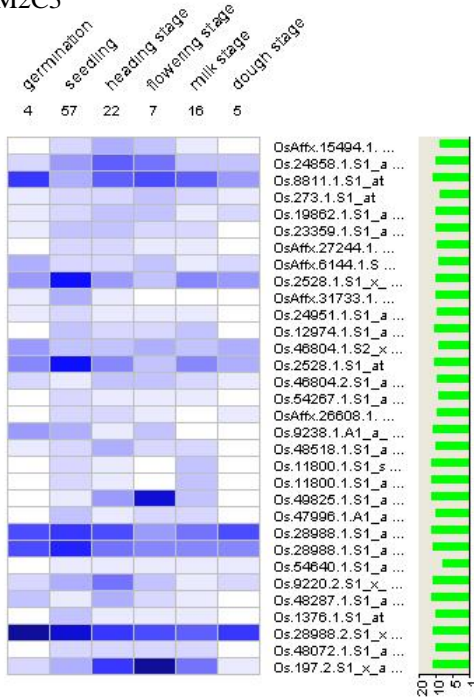

**G**

**M6C1**

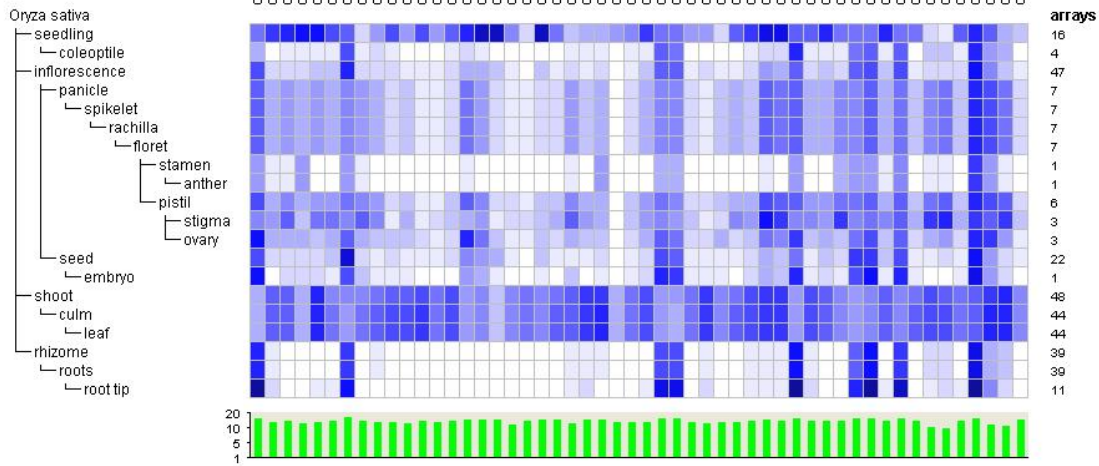

**H**

**M6C1**

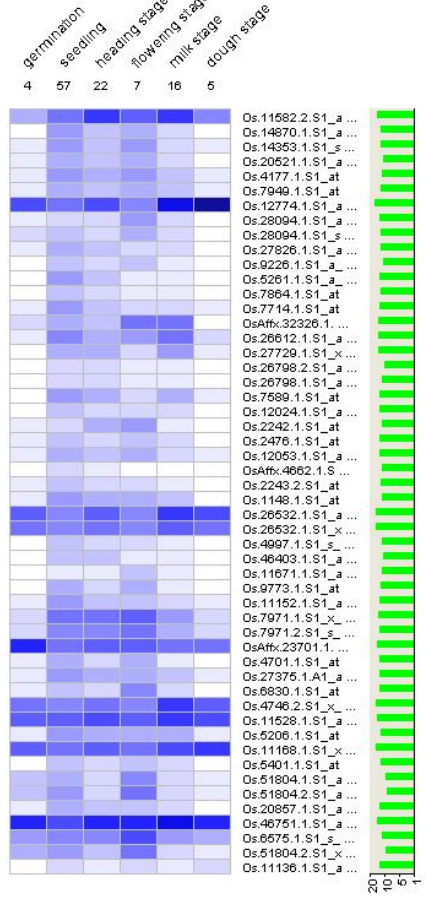

I

M6C2

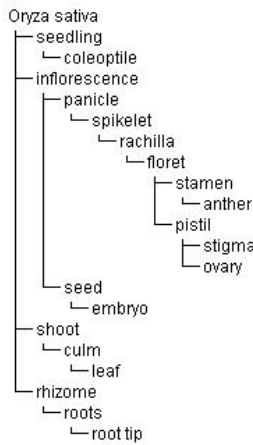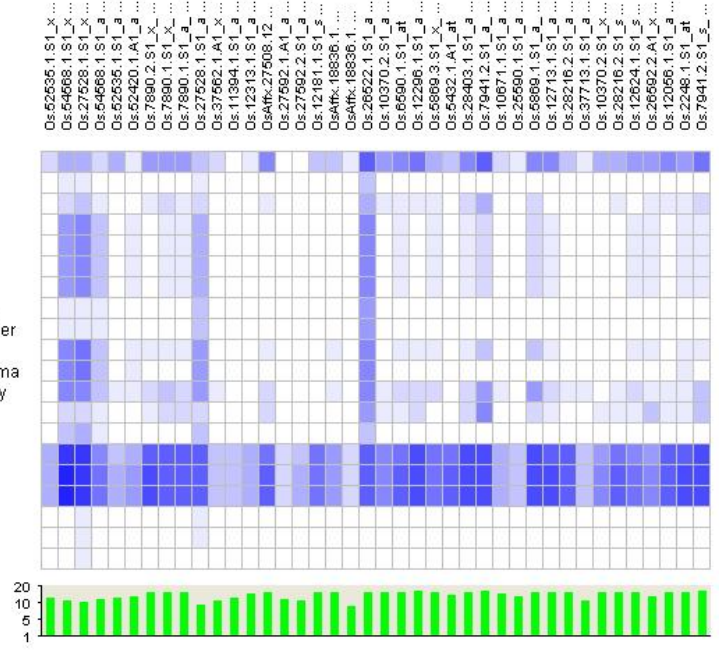

arrays

J

M6C2

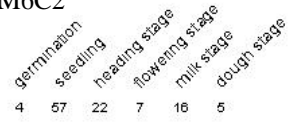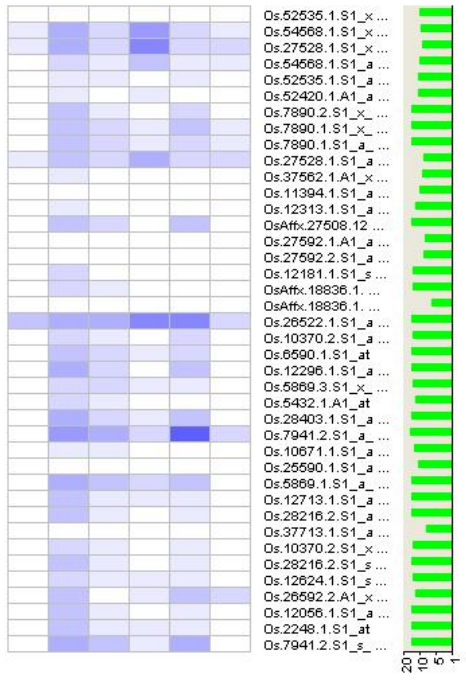

K

M6C3

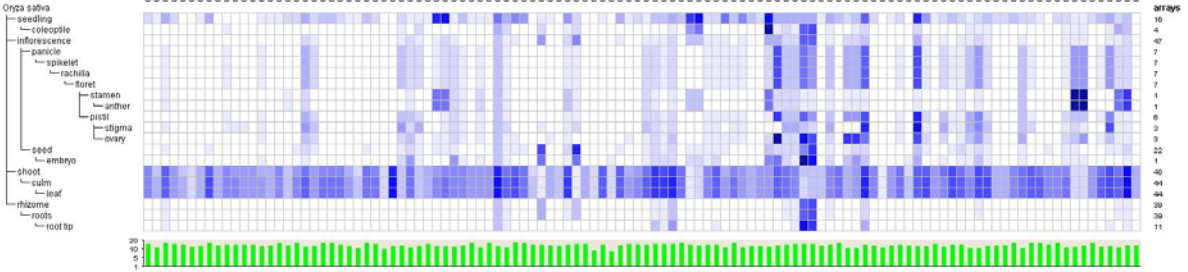

L

M6C3

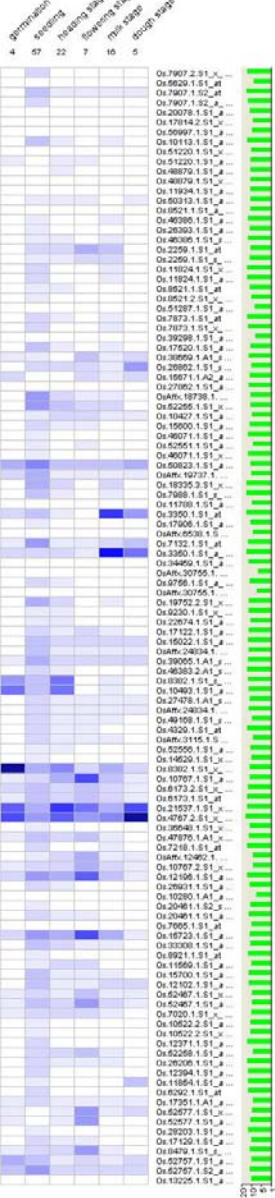



**M**

M6C4

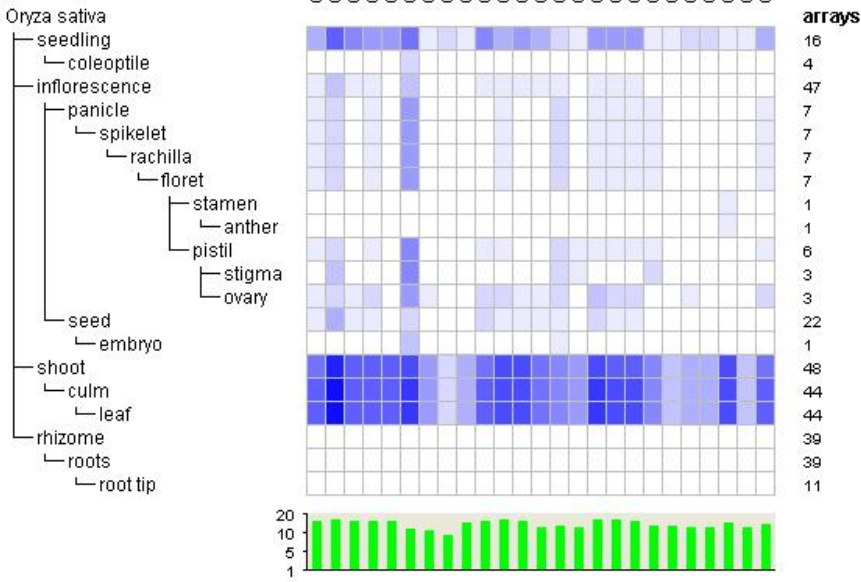

**N**

M6C4

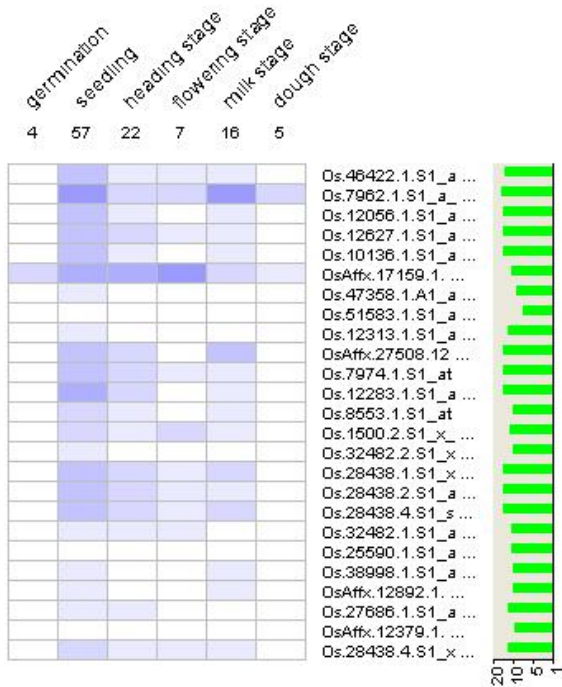

**O**

M6C5

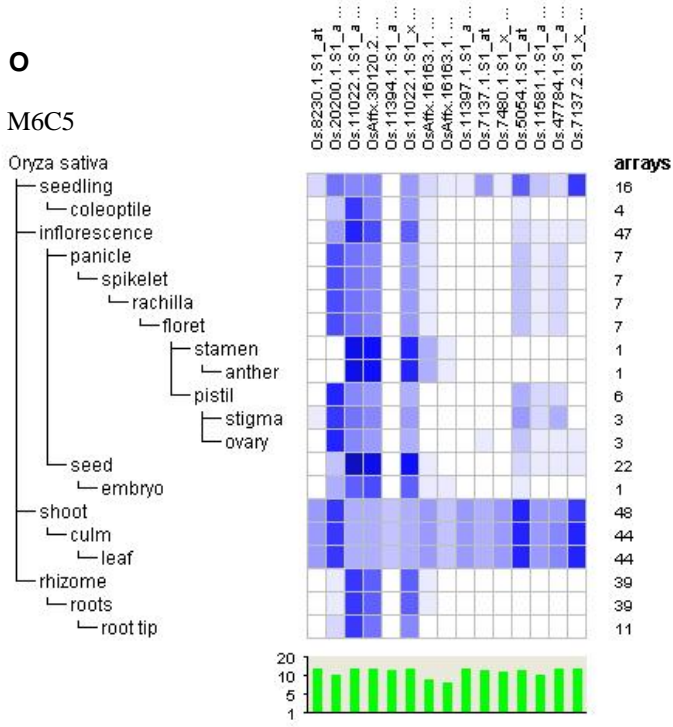

**P**

M6C5

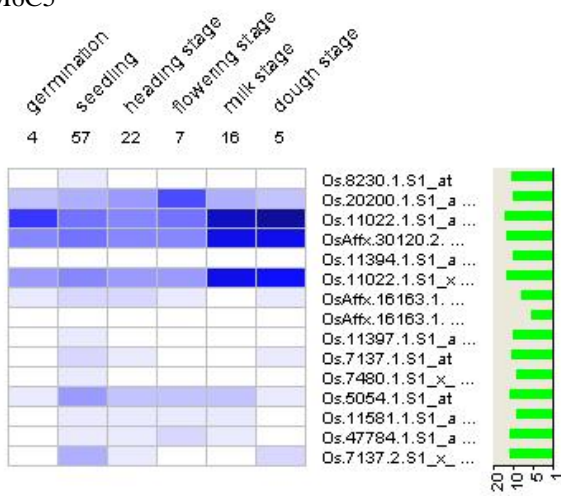

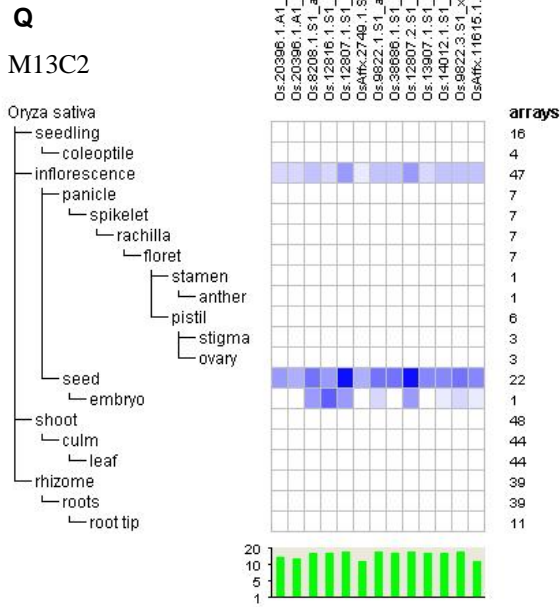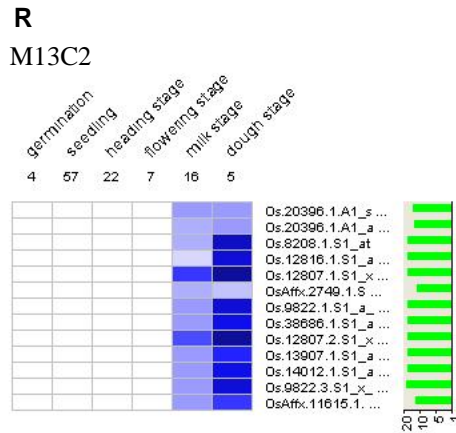

**Supplemental Figure S3. Genevestigator heat maps for top 10 connected clusters.** A, M2C1 anatomy heat map. B, M2C1 developmental heat map. C, M2C2 anatomy heat map. D, M2C2 development heat map. E, M2C3 anatomy heat map. F, M2C3 development heat map. G, M6C1 anatomy heat map. H, M6C1 development heat map. I, M6C2 anatomy heat map. J, M6C2 development heat map. K, M6C3 anatomy heat map. L, M6C3 development heat map. M, M6C4 anatomy heat map. N, M6C4 development heat map. O, M6C5 anatomy heat map. P, M6C5 development heat map. Q, M13C2 anatomy heat map. R, M13C2 development heat map
